# Supplementary material
Source: MDPI journal article supplement (https://www.mdpi.com/search?q=molbank-2020-M1152)
Supplement: s001 [file molbank-2020-M1152-s001.pdf]

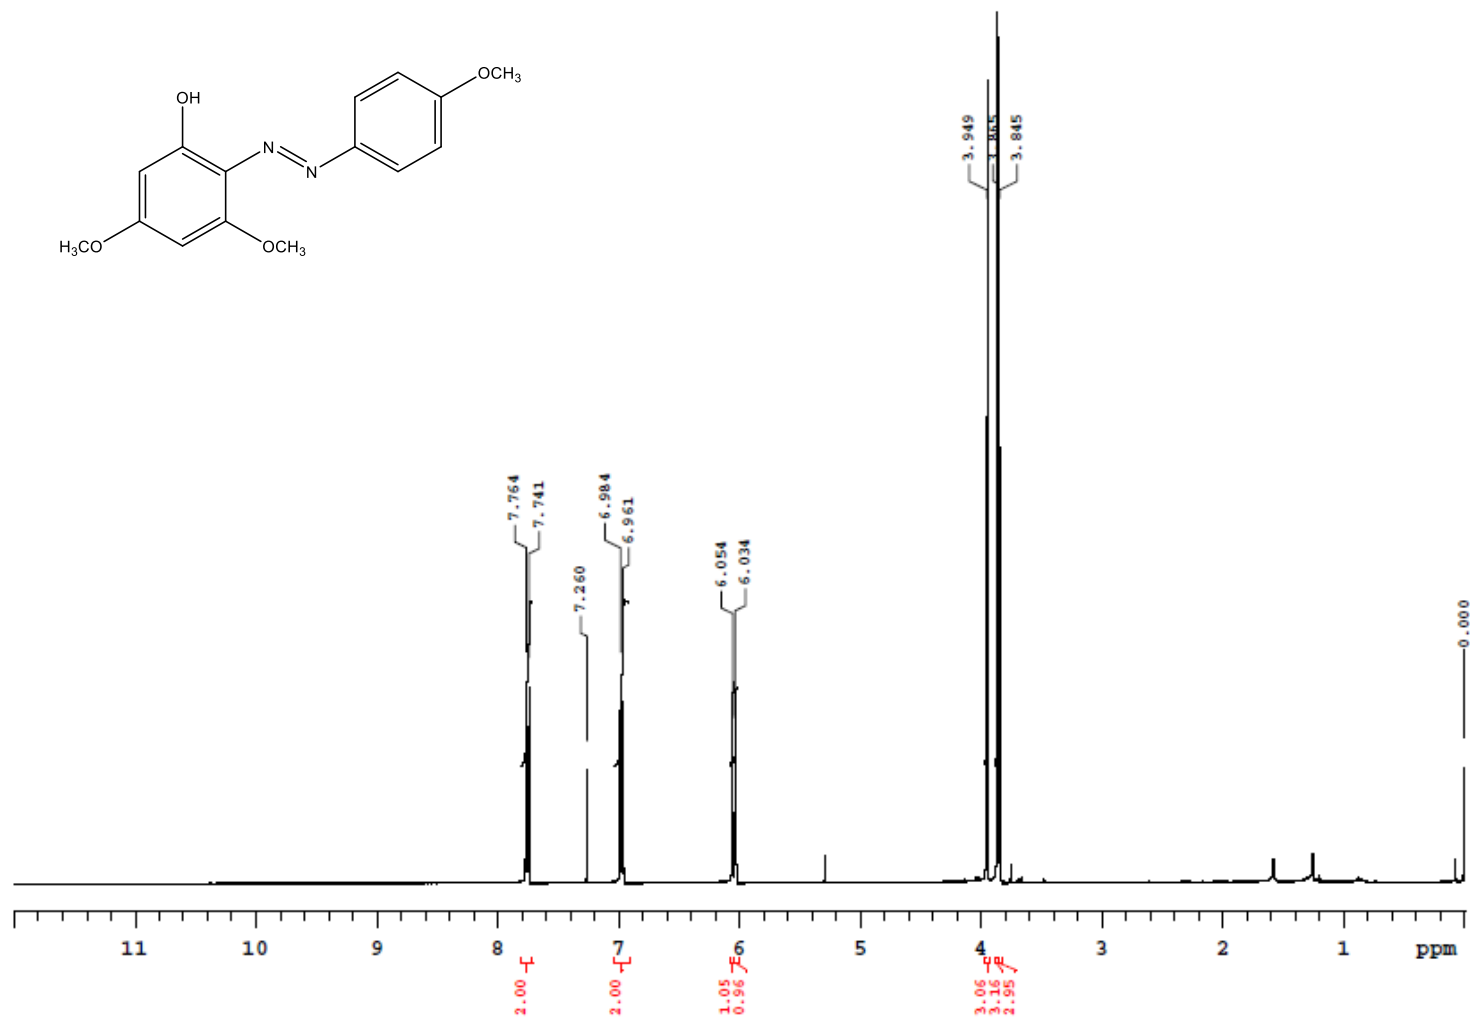

Figure S1.  $^1\text{H}$  NMR spectrum of compound 3 in  $\text{CDCl}_3$ .

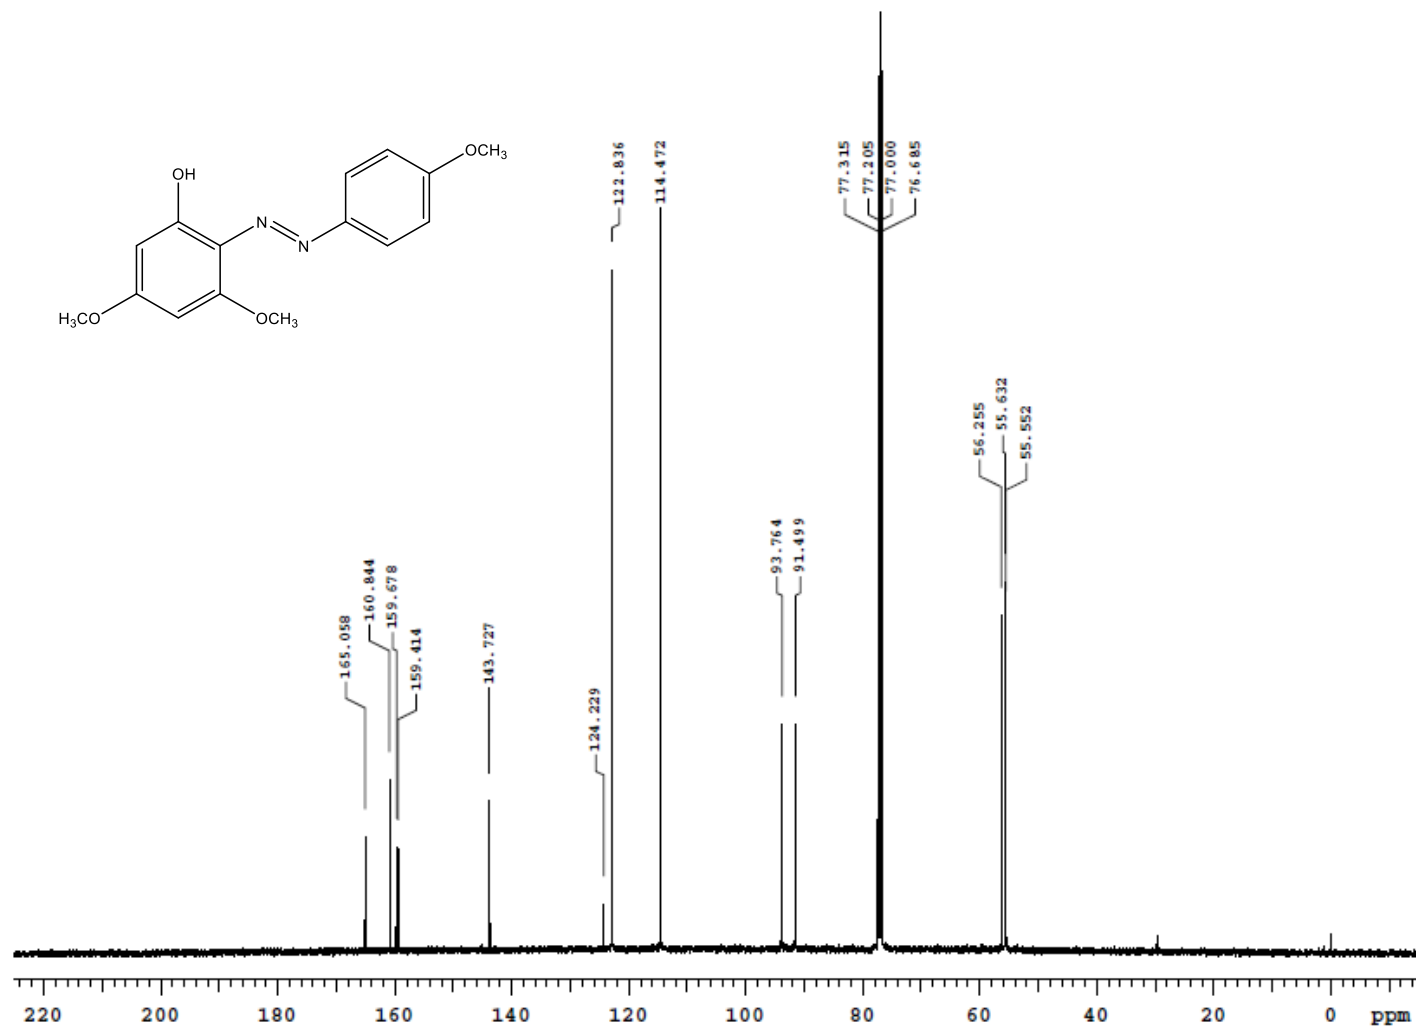

Figure S2. <sup>13</sup>C NMR spectrum of compound 3 in CDCl<sub>3</sub>.

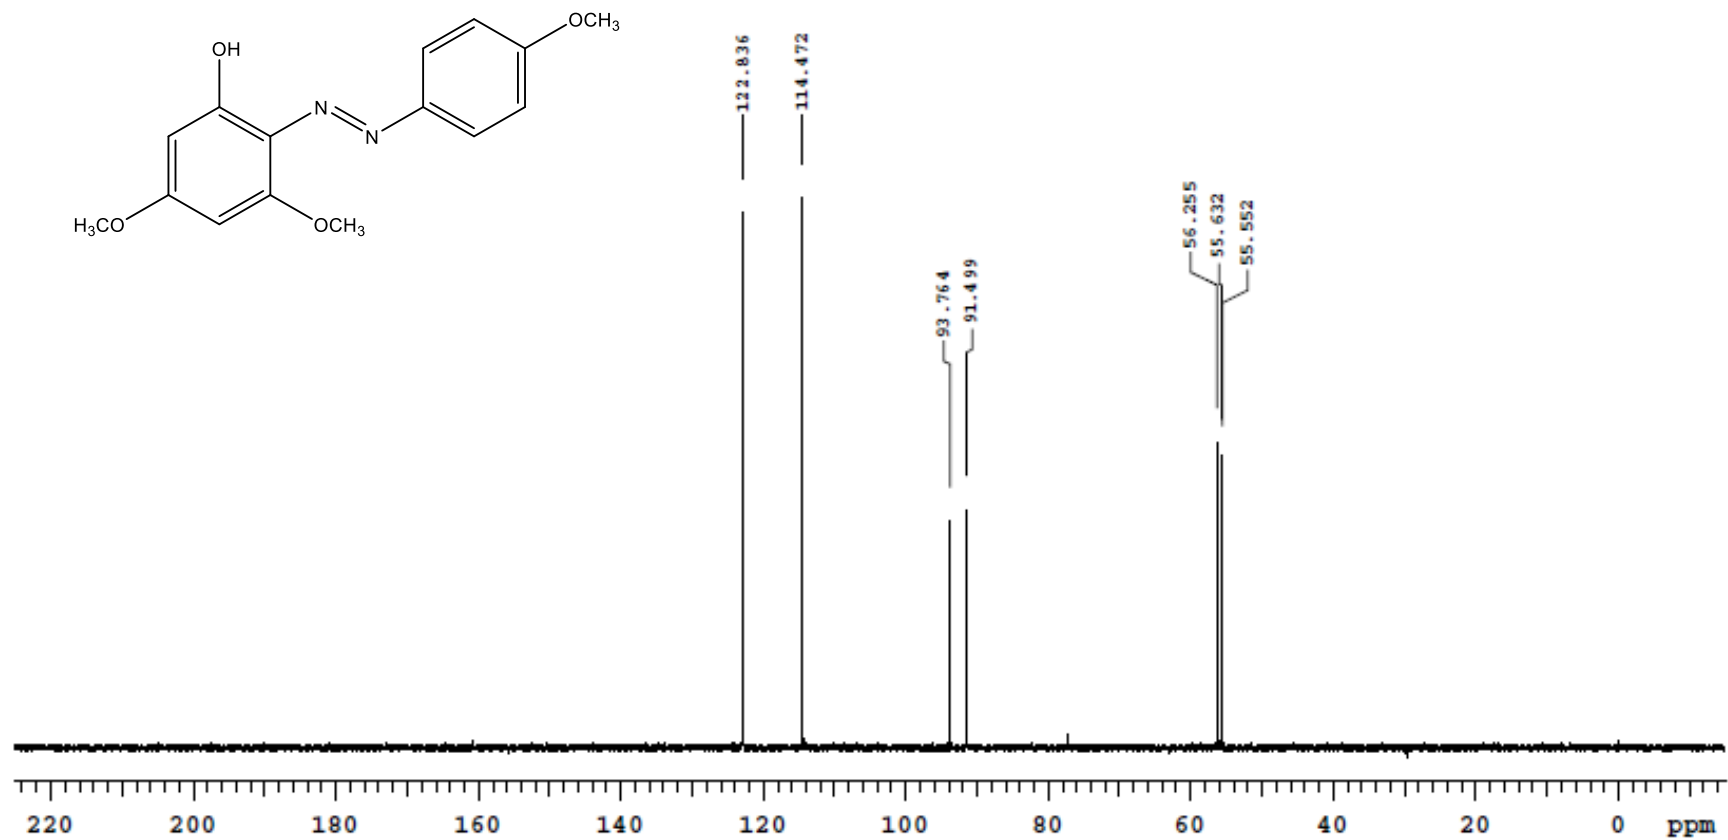

Figure S3. DEPT spectrum of compound 3 in CDCl<sub>3</sub>.

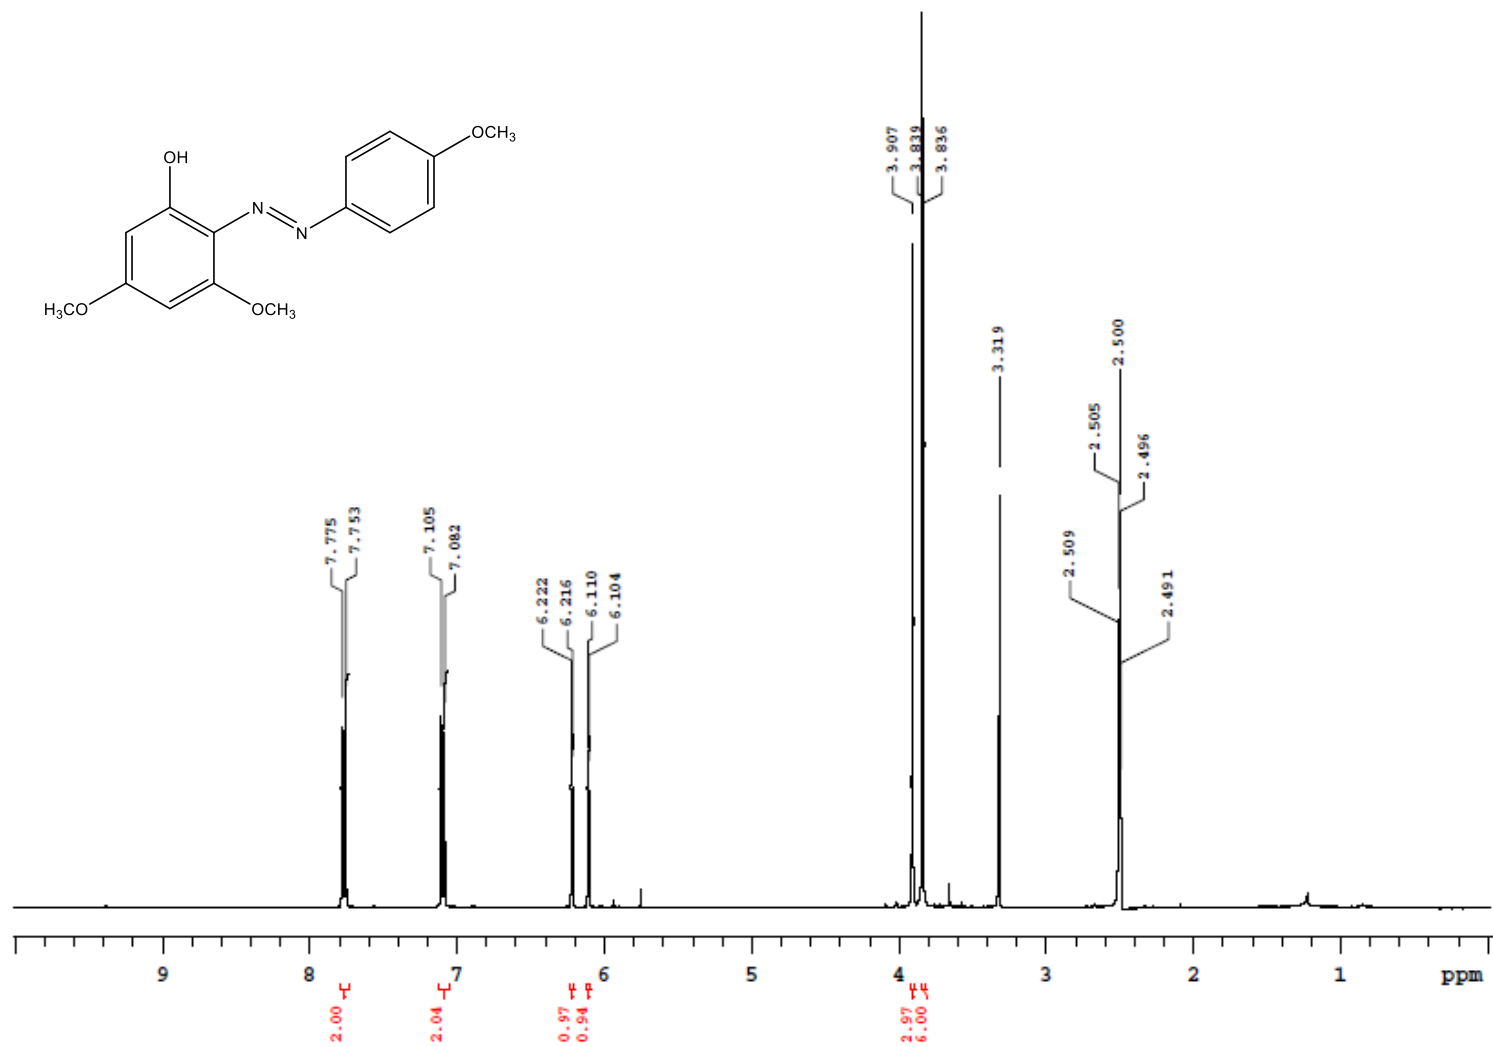

Figure S4. <sup>1</sup>H NMR spectrum of compound 3 in DMSO-*d*<sub>6</sub>.

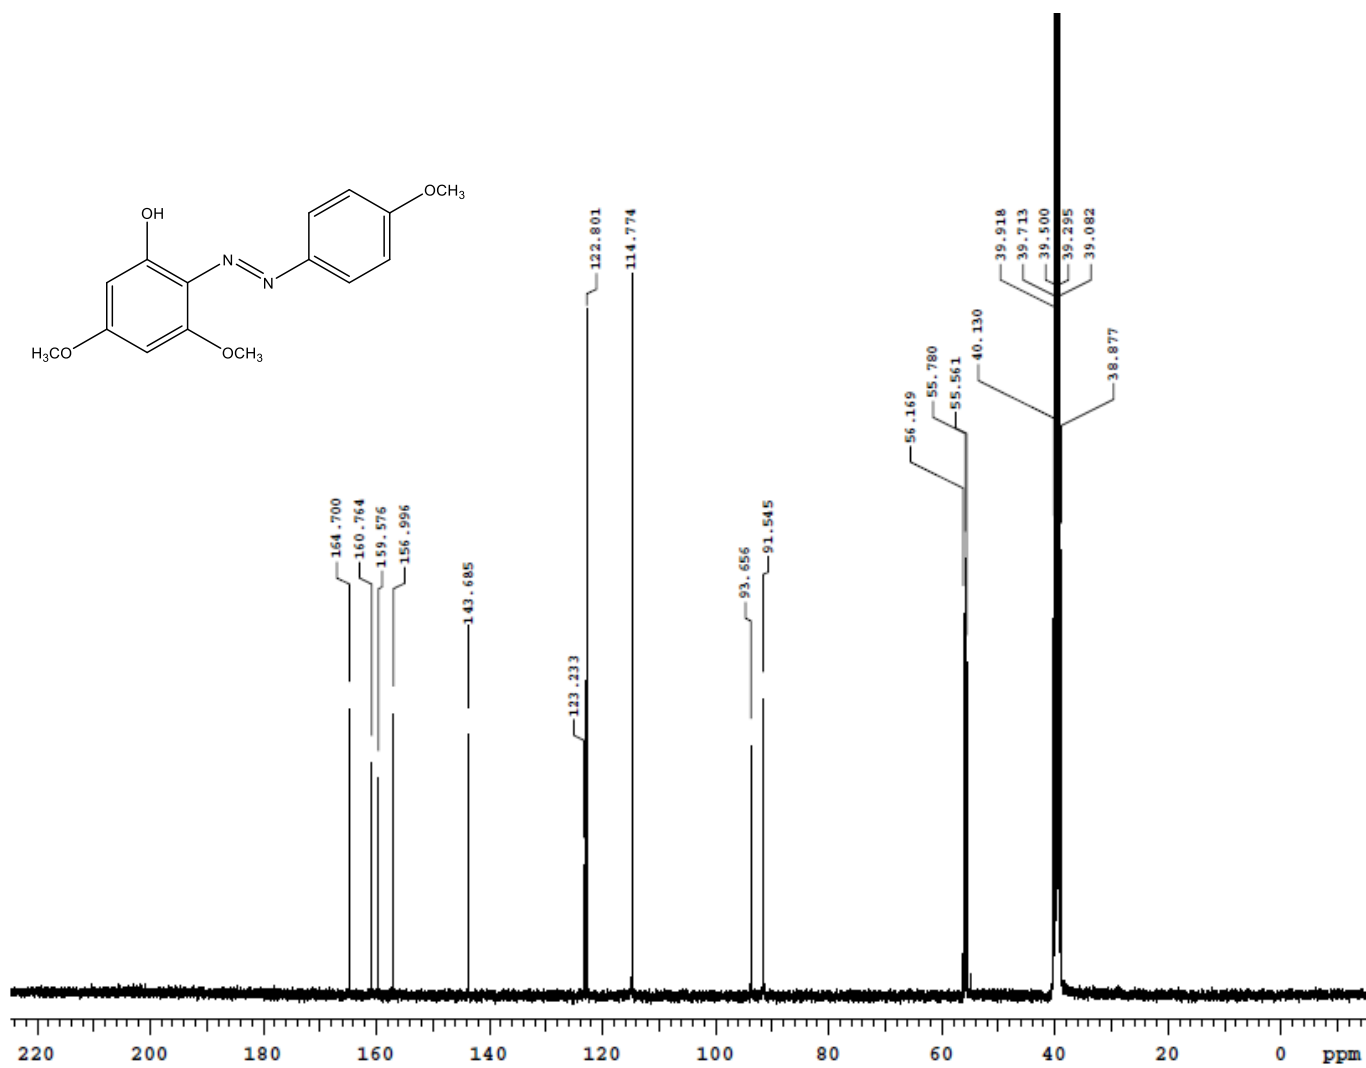

Figure S5.  $^{13}\text{C}$  NMR spectrum of compound 3 in  $\text{DMSO-}d_6$ .

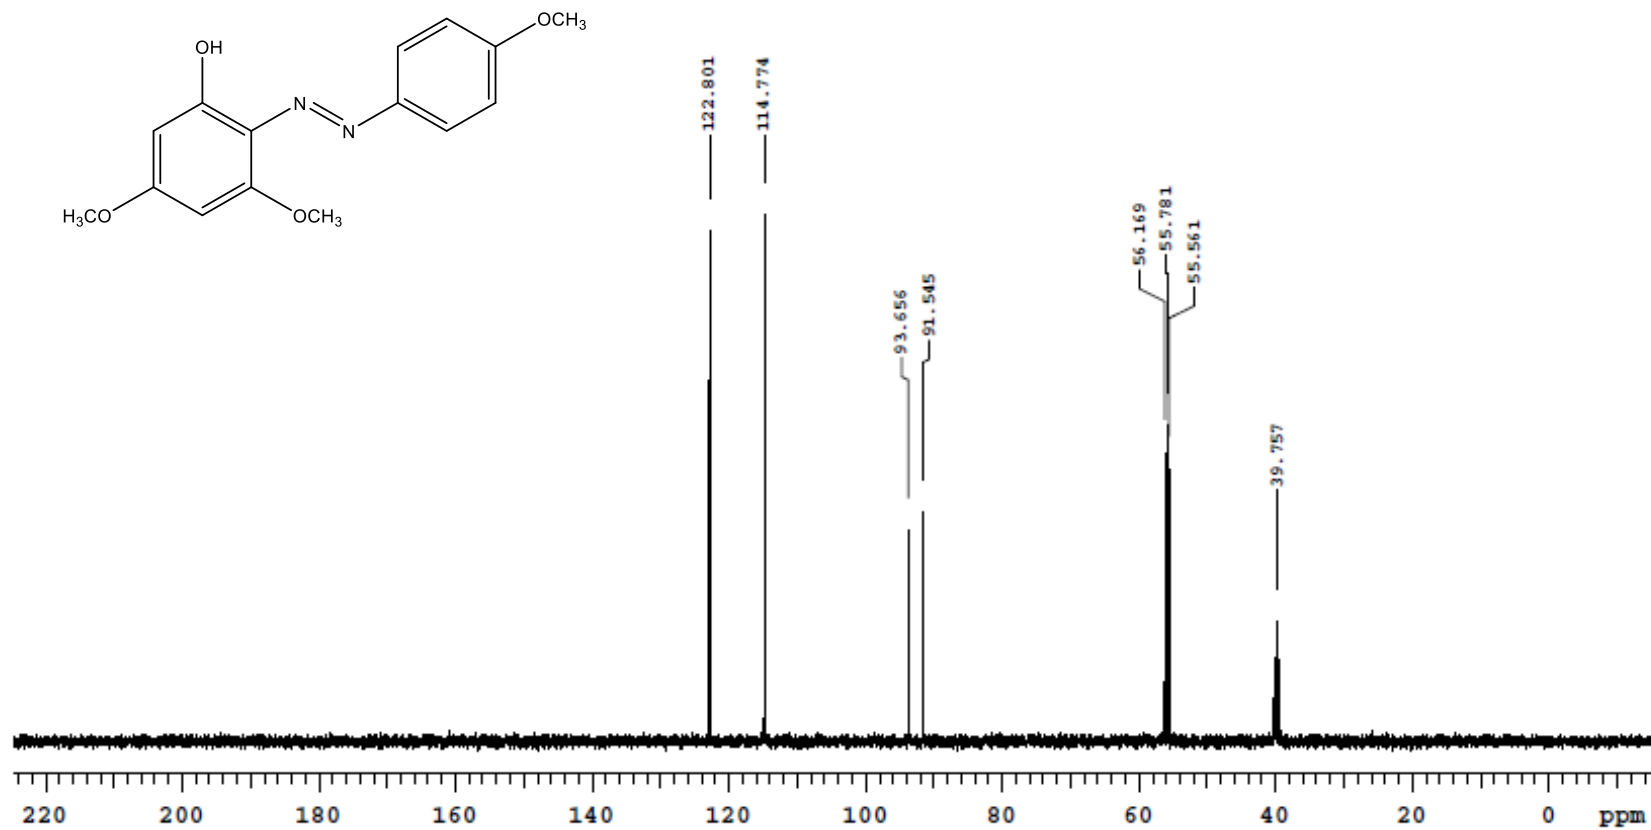

Figure S6. DEPT spectrum of compound 3 in DMSO-*d*<sub>6</sub>.

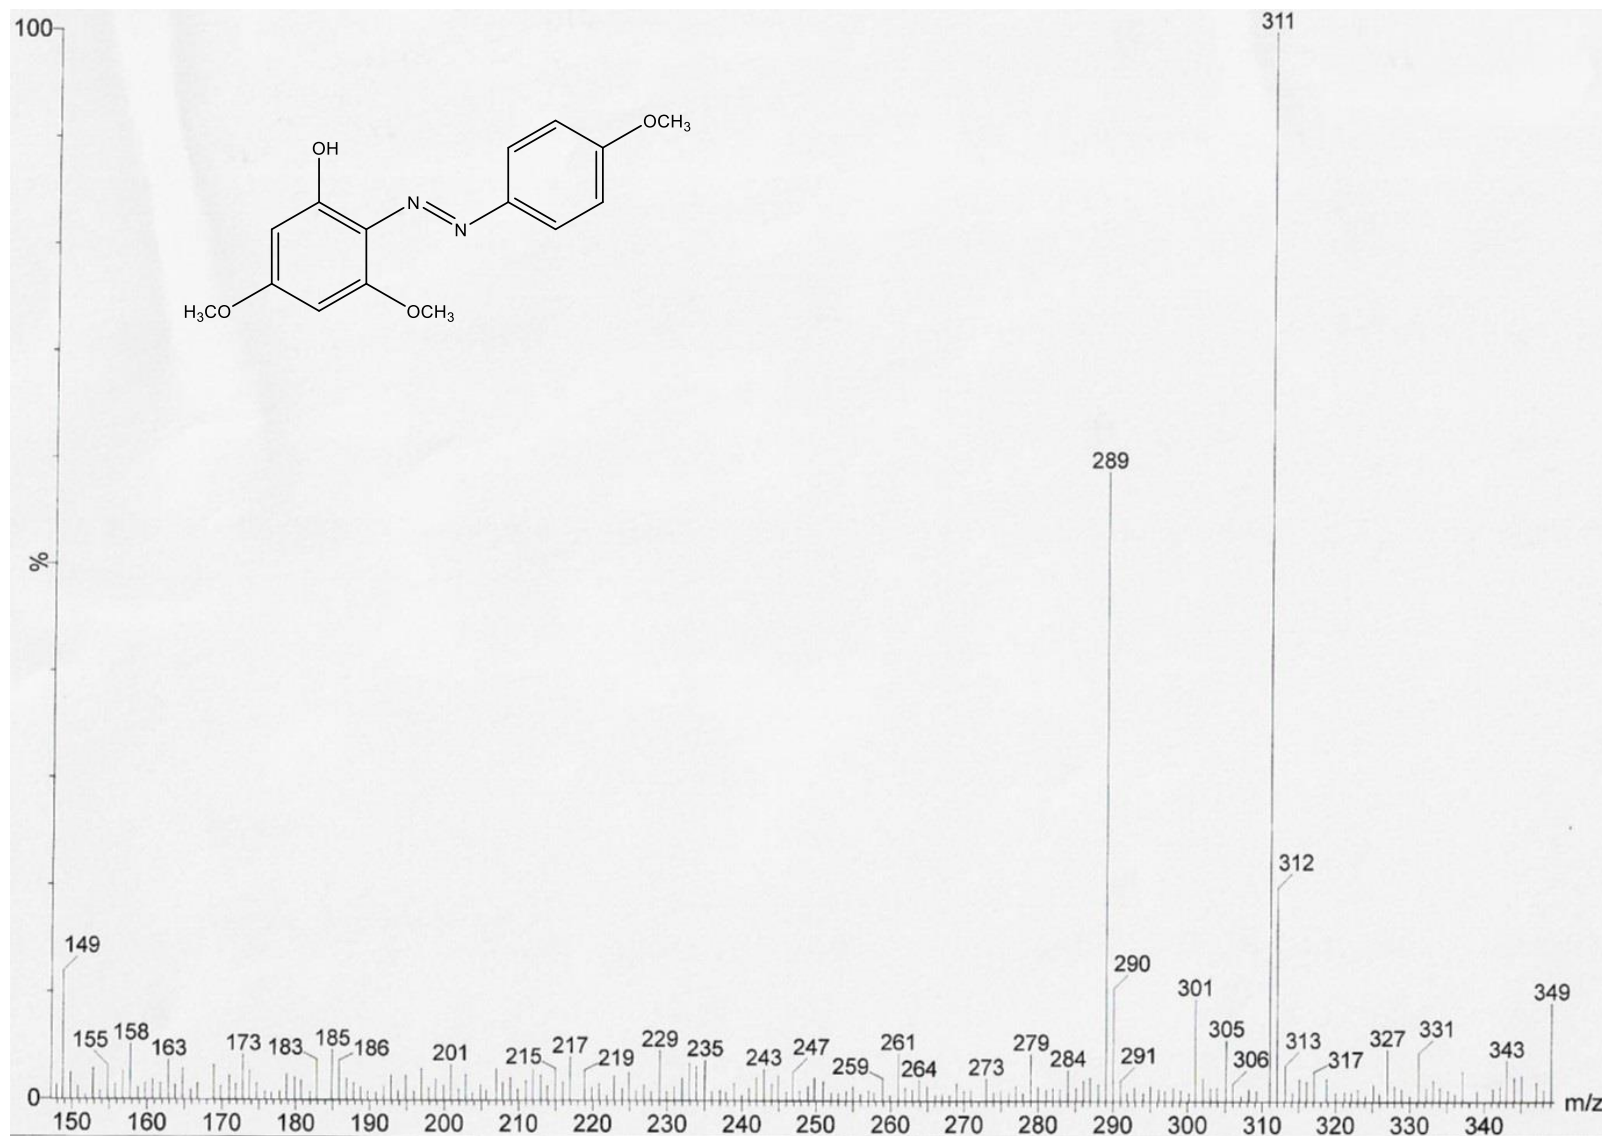

Figure S7. ESI-MS spectrum of compound 3.

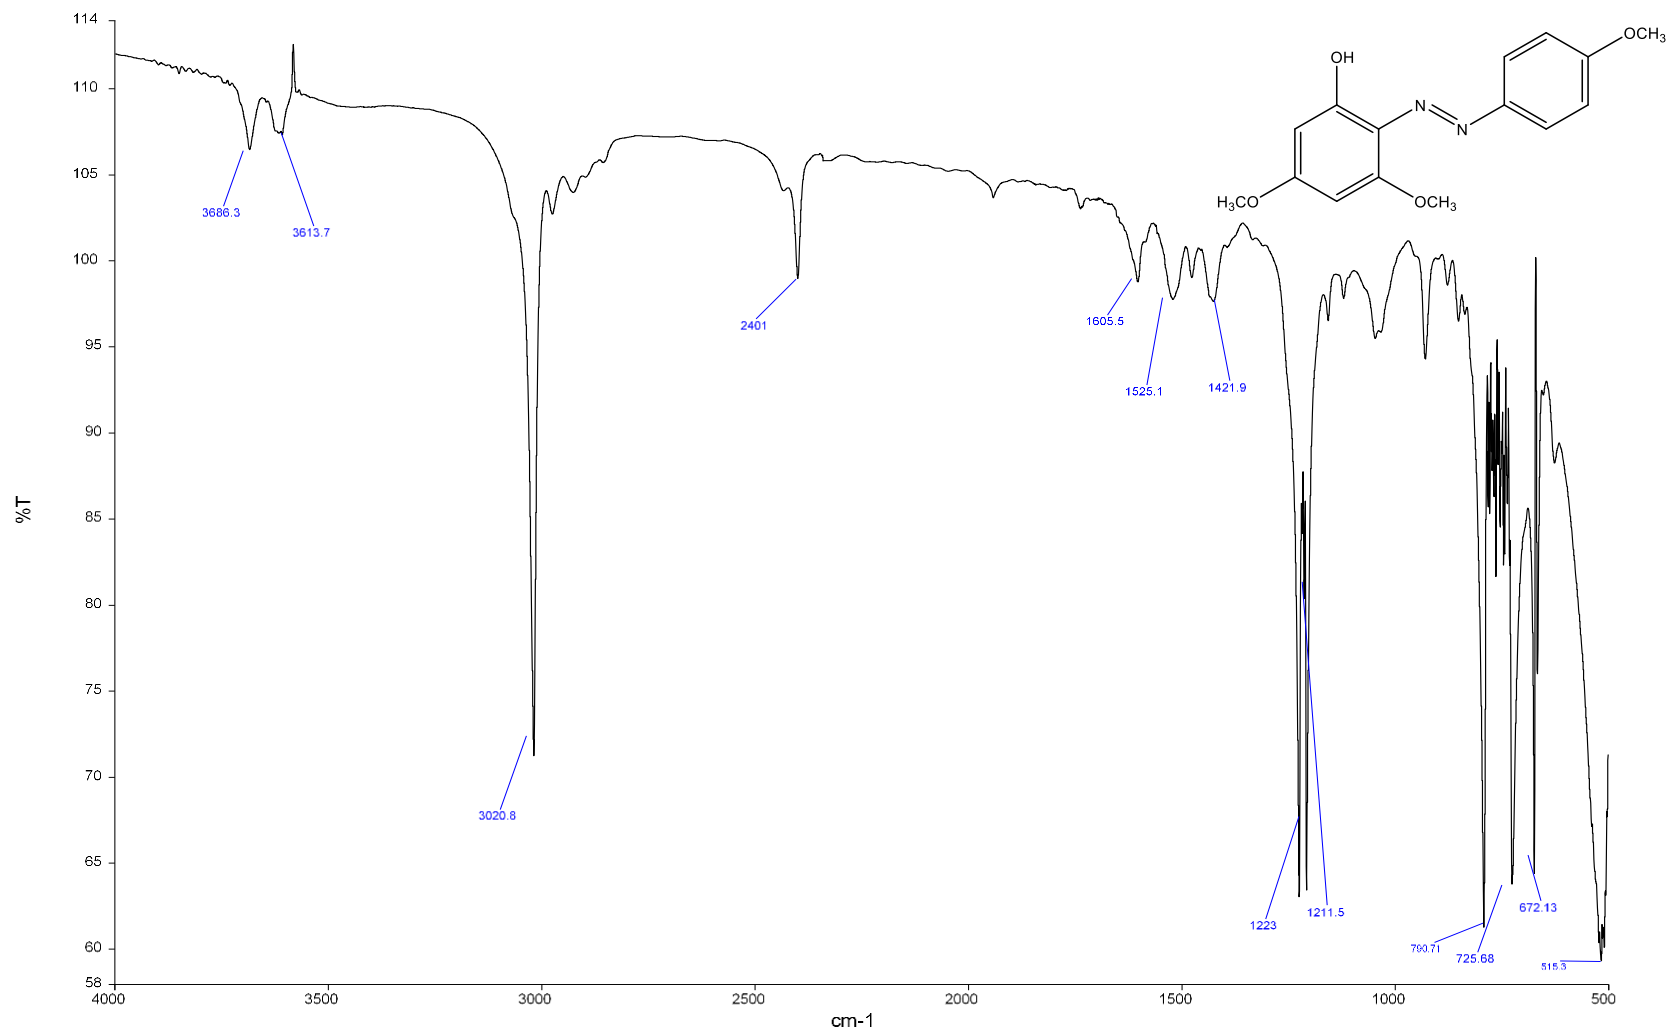

Figure S8. FT-IR spectrum of compound 3.
